# Supplementary material
Source: PubMed Central journal article supplement (PMC4229490)
Supplement: NIHMS595155-supplement-Supp_MaterialS6-S26.pdf [file NIHMS595155-supplement-Supp_MaterialS6-S26.pdf]

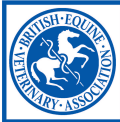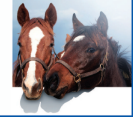

**Supplementary Item 6:** Yearling Sales Price ANOVA, all horses (n = 278).

| <b>Predictor Variable</b> | <b>Sum of Squares</b> | <b>Degrees of Freedom</b> | <b>F value</b> | <b>Pr(&gt;F)</b> |
|---------------------------|-----------------------|---------------------------|----------------|------------------|
| OC                        | 0.774                 | 1                         | 1.2415         | 0.27             |
| gender                    | 7.874                 | 2                         | 6.3169         | <b>0.002</b>     |
| sale                      | 39.548                | 4                         | 15.8629        | <b>&lt;0.001</b> |
| sire                      | 49.128                | 45                        | 1.7516         | <b>0.004</b>     |

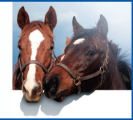

**Supplementary Item 7:** Summary of 2-year-old performance measures for foals in the short-term performance cohort (n = 278) and randomly selected 2010 foals (n = 288). P-value for the outcome “starting at 2” was determined by comparing proportions using a two-sided test. P-value for the remaining outcomes was determined using a Kolmogorov-Smirnov test, which tests the entire distribution of data rather than only the population average.

|                                       |        | Short-Term Performance Cohort | Randomly Selected 2010 Foals | p-value |
|---------------------------------------|--------|-------------------------------|------------------------------|---------|
| Starting at 2                         |        | 171/278<br>(61.5%)            | 163/288<br>(56.6%)           | 0.27    |
| Sale Price                            | Mean   | \$33,510                      | \$33,250                     | 0.90    |
|                                       | Median | \$22,000                      | \$20,000                     |         |
|                                       | Range  | \$1,500-260,000               | \$700-450,000                |         |
| Starts                                | Mean   | 4.3                           | 3.5                          | 0.36    |
|                                       | Median | 3                             | 1.5                          |         |
|                                       | Range  | 0-21                          | 0-18                         |         |
| Earnings<br>(starters only)           | Mean   | \$27,850                      | \$31,740                     | 0.23    |
|                                       | Median | \$9,102                       | \$7,355                      |         |
|                                       | Range  | \$1-531,900                   | \$1-918,300                  |         |
| Earnings per Start<br>(starters only) | Mean   | \$3,043                       | \$3,814                      | 0.39    |
|                                       | Median | \$1,178                       | \$1,319                      |         |
|                                       | Range  | \$0.25-48,360                 | \$0.20-91,830                |         |
| Fastest Time (s)                      | Mean   | 118.4                         | 117.9                        | 0.24    |
|                                       | Median | 118.0                         | 117.0                        |         |

|  |       |                          |                         |  |
|--|-------|--------------------------|-------------------------|--|
|  | Range | 111.2-129.6<br>(n = 111) | 109.4-130.8<br>(n = 77) |  |
|--|-------|--------------------------|-------------------------|--|



## Supplementary Item 8: OC Status ANOVA, all horses (n = 278)

| Predictor Variable | Degrees of Freedom | Deviance | Residual Degrees of Freedom | Residual Deviance | F value | Pr(>F)      |
|--------------------|--------------------|----------|-----------------------------|-------------------|---------|-------------|
| NULL               |                    |          | 277                         | 384.87            |         |             |
| gender             | 2                  | 3.716    | 275                         | 381.16            | 1.6342  | 0.20        |
| gait               | 1                  | 5.685    | 274                         | 375.47            | 5.0004  | <b>0.03</b> |
| sire               | 45                 | 61.968   | 229                         | 313.50            | 1.2113  | 0.18        |



**Supplementary Item 9:** Multiple regression results for pacers (*Short-term performance: Pacers and trotters at 2 years of age*). OC = osteochondrosis; G = gelding; M = mare; S = stallion; OR = odds ratio; IRR = incident rate ratio; time = fastest recorded time over a mile. The reference group for effect estimates is denoted by REF.

| Outcome Variable | Predictor Variable | Estimate (OR)  | 2.5% | 97.5% | p-value |
|------------------|--------------------|----------------|------|-------|---------|
| Started (yes/no) | OC (no)            | REF            | n/a  | n/a   | n/a     |
|                  | OC (yes)           | 0.84           | 0.41 | 1.71  | 0.62    |
|                  | gender (G)         | REF            | n/a  | n/a   | n/a     |
|                  | gender (M)         | 0.80           | 0.36 | 1.75  | 0.58    |
|                  | gender (S)         | 0.83           | 0.31 | 2.32  | 0.72    |
| Outcome Variable | Predictor Variable | Estimate (IRR) | 2.5% | 97.5% | p-value |
| Starts (number)  | OC (no)            | REF            | n/a  | n/a   | n/a     |
|                  | OC (yes)           | 1.10           | 0.80 | 1.52  | 0.56    |
|                  | gender (G)         | REF            | n/a  | n/a   | n/a     |
|                  | gender (M)         | 0.88           | 0.62 | 1.25  | 0.48    |
|                  | gender (S)         | 0.77           | 0.50 | 1.21  | 0.25    |
| Wins (number)    | OC (no)            | REF            | n/a  | n/a   | n/a     |
|                  | OC (yes)           | 0.73           | 0.50 | 1.05  | 0.11    |

|                               | gender (G)         | REF      | n/a  | n/a   | n/a              |
|-------------------------------|--------------------|----------|------|-------|------------------|
|                               | gender (M)         | 0.87     | 0.57 | 1.32  | 0.50             |
|                               | gender (S)         | 0.98     | 0.59 | 1.63  | 0.93             |
|                               | starts             | 1.15     | 1.10 | 1.21  | <b>&lt;0.001</b> |
|                               | time               | 0.86     | 0.81 | 0.91  | <b>&lt;0.001</b> |
|                               |                    |          |      |       |                  |
| Top 3<br>Finishes<br>(number) | OC (no)            | REF      | n/a  | n/a   | n/a              |
|                               | OC (yes)           | 1.01     | 0.92 | 1.11  | 0.90             |
|                               | gender (G)         | REF      | n/a  | n/a   | n/a              |
|                               | gender (M)         | 1.05     | 0.95 | 1.16  | 0.38             |
|                               | gender (S)         | 1.02     | 0.89 | 1.16  | 0.78             |
|                               | starts             | 1.13     | 1.12 | 1.15  | <b>&lt;0.001</b> |
|                               | time               | 0.97     | 0.95 | 0.98  | <b>&lt;0.001</b> |
|                               |                    |          |      |       |                  |
| Outcome Variable              | Predictor Variable | Estimate | 2.5% | 97.5% | p-value          |
| Earnings<br>(log[\$])         | OC (no)            | REF      | n/a  | n/a   | n/a              |
|                               | OC (yes)           | 1.45     | 0.72 | 2.91  | 0.30             |
|                               | gender (G)         | REF      | n/a  | n/a   | n/a              |
|                               | gender (M)         | 2.21     | 1.02 | 4.78  | <b>0.04</b>      |
|                               | gender (S)         | 1.01     | 0.39 | 2.63  | 0.99             |
|                               | starts             | 1.31     | 1.20 | 1.42  | <b>&lt;0.001</b> |
|                               | time               | 0.68     | 0.61 | 0.76  | <b>&lt;0.001</b> |
|                               |                    |          |      |       |                  |
| Earnings Per<br>Start         | OC (no)            | REF      | n/a  | n/a   | n/a              |
|                               | OC (yes)           | 1.70     | 0.84 | 3.43  | 0.14             |

|                                      |            |           |       |       |                  |
|--------------------------------------|------------|-----------|-------|-------|------------------|
| (log[\$])                            | gender (G) | REF       | n/a   | n/a   | n/a              |
|                                      | gender (M) | 1.83      | 0.84  | 3.99  | 0.13             |
|                                      | gender (S) | 0.81      | 0.31  | 2.11  | 0.66             |
|                                      | time       | 0.72      | 0.65  | 0.81  | <b>&lt;0.001</b> |
|                                      |            |           |       |       |                  |
| Fastest Time<br>(s)                  | OC (no)    | REF       | n/a   | n/a   | n/a              |
|                                      | OC (yes)   | 1.15      | -0.41 | 2.70  | 0.15             |
|                                      | gender (G) | REF       | n/a   | n/a   | n/a              |
|                                      | gender (M) | -0.91     | -2.64 | 0.82  | 0.30             |
|                                      | gender (S) | -2.16     | -4.25 | -0.07 | <b>0.04</b>      |
|                                      |            |           |       |       |                  |
| Yearling<br>Sales Price<br>(log[\$]) | OC (no)    | REF       | n/a   | n/a   | n/a              |
|                                      | OC (yes)   | 0.97      | 0.71  | 1.33  | 0.86             |
|                                      | gender (G) | REF       | n/a   | n/a   | n/a              |
|                                      | gender (M) | 0.63      | 0.45  | 0.89  | <b>0.01</b>      |
|                                      | gender (S) | 0.88      | 0.57  | 1.37  | 0.58             |
|                                      | sale       | see ANOVA |       |       |                  |
|                                      | sire       |           |       |       |                  |

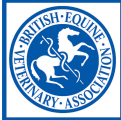

**Supplementary Item 10:** Yearling Sales Price ANOVA, all pacers (n = 151).

| <b>Predictor Variable</b> | <b>Sum of Squares</b> | <b>Degrees of Freedom</b> | <b>F value</b> | <b>Pr(&gt;F)</b> |
|---------------------------|-----------------------|---------------------------|----------------|------------------|
| OC                        | 0.02                  | 1                         | 0.0296         | 0.86             |
| gender                    | 5.167                 | 2                         | 3.8556         | <b>0.02</b>      |
| sale                      | 21.975                | 4                         | 8.1995         | <b>&lt;0.001</b> |
| sire                      | 21.584                | 26                        | 1.239          | 0.22             |





**Supplementary Item 11:** Multiple regression results for trotters (*short-term performance: pacers and trotters at 2 years of age*). OC = osteochondrosis; G = gelding; M = mare; S = stallion; OR = odds ratio; IRR = incident rate ratio; time = fastest recorded time over a mile. The reference group for effect estimates is denoted by REF.

| Outcome Variable | Predictor Variable | Estimate (OR)  | 2.5% | 97.5% | p-value |
|------------------|--------------------|----------------|------|-------|---------|
| Started (yes/no) | OC (no)            | REF            | n/a  | n/a   | n/a     |
|                  | OC (yes)           | 0.62           | 0.30 | 1.27  | 0.20    |
|                  | gender (G)         | REF            | n/a  | n/a   | n/a     |
|                  | gender (M)         | 0.73           | 0.32 | 1.64  | 0.44    |
|                  | gender (S)         | 0.51           | 0.19 | 1.34  | 0.18    |
| Outcome Variable | Predictor Variable | Estimate (IRR) | 2.5% | 97.5% | p-value |
| Starts           | OC (no)            | REF            | n/a  | n/a   | n/a     |
|                  | OC (yes)           | 0.82           | 0.51 | 1.31  | 0.41    |
|                  | gender (G)         | REF            | n/a  | n/a   | n/a     |
|                  | gender (M)         | 0.87           | 0.51 | 1.49  | 0.62    |
|                  | gender (S)         | 0.93           | 0.50 | 1.78  | 0.83    |
| Wins             | OC (no)            | REF            | n/a  | n/a   | n/a     |
|                  | OC (yes)           | 1.03           | 0.85 | 1.83  | 0.92    |
|                  | gender (G)         | REF            | n/a  | n/a   | n/a     |

|                         |                           |                 |             |              |                  |
|-------------------------|---------------------------|-----------------|-------------|--------------|------------------|
|                         | gender (M)                | 0.98            | 0.52        | 1.85         | 0.95             |
|                         | gender (S)                | 1.09            | 0.48        | 2.41         | 0.83             |
|                         | starts                    | 1.15            | 1.05        | 1.27         | <b>0.01</b>      |
|                         | time                      | 0.86            | 0.77        | 0.96         | <b>0.01</b>      |
|                         |                           |                 |             |              |                  |
| Top 3 Finishes          | OC (no)                   | REF             | n/a         | n/a          | n/a              |
|                         | OC (yes)                  | 1.19            | 0.99        | 1.44         | 0.08             |
|                         | gender (G)                | REF             | n/a         | n/a          | n/a              |
|                         | gender (M)                | 1.10            | 0.89        | 1.37         | 0.39             |
|                         | gender (S)                | 0.91            | 0.69        | 1.19         | 0.50             |
|                         | starts                    | 1.21            | 1.17        | 1.25         | <b>&lt;0.001</b> |
|                         | time                      | 1.00            | 0.97        | 1.07         | 0.89             |
|                         |                           |                 |             |              |                  |
| <b>Outcome Variable</b> | <b>Predictor Variable</b> | <b>Estimate</b> | <b>2.5%</b> | <b>97.5%</b> | <b>p-value</b>   |
| Earnings                | OC (no)                   | REF             | n/a         | n/a          | n/a              |
|                         | OC (yes)                  | 2.33            | 0.57        | 9.49         | 0.23             |
|                         | gender (G)                | REF             | n/a         | n/a          | n/a              |
|                         | gender (M)                | 1.51            | 0.30        | 7.52         | 0.61             |
|                         | gender (S)                | 1.42            | 0.18        | 11.14        | 0.73             |
|                         | starts                    | 1.65            | 1.31        | 2.08         | <b>&lt;0.001</b> |
|                         | time                      | 0.82            | 0.63        | 1.06         | 0.12             |
|                         |                           |                 |             |              |                  |
| Earnings Per Start      | OC (no)                   | REF             | n/a         | n/a          | n/a              |
|                         | OC (yes)                  | 2.07            | 0.47        | 9.05         | 0.32             |
|                         | gender (G)                | REF             | n/a         | n/a          | n/a              |

|                         |            |           |       |       |             |
|-------------------------|------------|-----------|-------|-------|-------------|
|                         | gender (M) | 1.28      | 0.24  | 6.97  | 0.77        |
|                         | gender (S) | 4.11      | 0.54  | 31.35 | 0.17        |
|                         | time       | 0.71      | 0.55  | 0.91  | <b>0.01</b> |
|                         |            |           |       |       |             |
| Fastest Time            | OC (no)    | REF       | n/a   | n/a   | n/a         |
|                         | OC (yes)   | -1.28     | -3.17 | 0.60  | 0.18        |
|                         | gender (G) | REF       | n/a   | n/a   | n/a         |
|                         | gender (M) | -1.92     | -4.03 | 0.19  | 0.07        |
|                         | gender (S) | -1.11     | -3.74 | 1.53  | 0.40        |
|                         |            |           |       |       |             |
| Yearling<br>Sales Price | OC (no)    | REF       | n/a   | n/a   | n/a         |
|                         | OC (yes)   | 0.84      | 0.62  | 1.15  | 0.28        |
|                         | gender (G) | REF       | n/a   | n/a   | n/a         |
|                         | gender (M) | 0.74      | 0.53  | 1.03  | 0.08        |
|                         | gender (S) | 1.02      | 0.67  | 1.56  | 0.92        |
|                         | sale       | see ANOVA |       |       |             |
|                         | sire       |           |       |       |             |

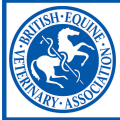

**Supplementary Item 12: Yearling Sales Price ANOVA, all trotters (n = 127).**

| <b>Predictor Variable</b> | <b>Sum of Squares</b> | <b>Degrees of Freedom</b> | <b>F value</b> | <b>Pr(&gt;F)</b> |
|---------------------------|-----------------------|---------------------------|----------------|------------------|
| OC                        | 0.703                 | 1                         | 1.1994         | 0.28             |
| gender                    | 2.404                 | 2                         | 2.0511         | 0.13             |
| sale                      | 18.34                 | 4                         | 7.8243         | <b>&lt;0.001</b> |
| sire                      | 22.756                | 19                        | 2.0438         | <b>0.01</b>      |



**Supplementary Item 13:** Horses in the OC-affected group had models fit with lesion location and distribution as outcome variables (see Materials and Methods and Supplementary Item 2). DIRT = distal intermediate ridge of the tibia; MM = medial malleolus of the tibia; LTR = lateral trochlear ridge of the talus; bilat = bilateral; G = gelding; M = mare; S = stallion; P = pace; T = trot; OR = odds ratio. The reference group for effect estimates is denoted by REF.

| Outcome Variable | Predictor Variable | Estimate (OR) | 2.5% | 97.5% | p-value          |
|------------------|--------------------|---------------|------|-------|------------------|
| DIRT             | gender (G)         | REF           | n/a  | n/a   | n/a              |
|                  | gender (M)         | 0.75          | 0.31 | 1.79  | 0.52             |
|                  | gender (S)         | 2.01          | 0.68 | 6.55  | 0.22             |
|                  | gait (P)           | REF           | n/a  | n/a   | n/a              |
|                  | gait (T)           | 0.27          | 0.11 | 0.62  | <b>0.003</b>     |
| MM               | gender (G)         | REF           | n/a  | n/a   | n/a              |
|                  | gender (M)         | 1.15          | 0.48 | 2.82  | 0.75             |
|                  | gender (S)         | 0.73          | 0.25 | 2.03  | 0.55             |
|                  | gait (P)           | REF           | n/a  | n/a   | n/a              |
|                  | gait (T)           | 5.01          | 2.27 | 11.82 | <b>&lt;0.001</b> |
| LTR              | gender (G)         | REF           | n/a  | n/a   | n/a              |
|                  | gender (M)         | 1.08          | 0.46 | 2.56  | 0.87             |
|                  | gender (S)         | 0.41          | 0.12 | 1.23  | 0.13             |
|                  | gait (P)           | REF           | n/a  | n/a   | n/a              |

|       |            |      |      |      |      |
|-------|------------|------|------|------|------|
|       | gait (T)   | 0.88 | 0.40 | 1.95 | 0.76 |
|       |            |      |      |      |      |
| Bilat | gender (G) | REF  | n/a  | n/a  | n/a  |
|       | gender (M) | 0.49 | 0.22 | 1.11 | 0.09 |
|       | gender (S) | 0.78 | 0.30 | 2.00 | 0.60 |
|       | gait (P)   | REF  | n/a  | n/a  | n/a  |
|       | gait (T)   | 0.96 | 0.47 | 1.96 | 0.92 |

Lesion location and distribution were also examined with sire included in the model.



**Supplementary Item 14:** DIRT ANOVA, all OC-affected horses (n = 133).

| <b>Predictor Variable</b> | <b>Degrees of Freedom</b> | <b>Deviance</b> | <b>Residual Degrees of Freedom</b> | <b>Residual Deviance</b> | <b>F value</b> | <b>Pr(&gt;F)</b> |
|---------------------------|---------------------------|-----------------|------------------------------------|--------------------------|----------------|------------------|
| NULL                      |                           |                 | 131                                | 160.24                   |                |                  |
| gender                    | 2                         | 3.133           | 129                                | 157.10                   | 1.8911         | 0.16             |
| gait                      | 1                         | 10.053          | 128                                | 147.05                   | 12.1365        | <b>0.001</b>     |
| sire                      | 35                        | 51.112          | 93                                 | 95.94                    | 1.7629         | <b>0.016</b>     |



**Supplementary Item 15:** MM ANOVA, all OC-affected horses (n = 133).

| <b>Predictor Variable</b> | <b>Degrees of Freedom</b> | <b>Deviance</b> | <b>Residual Degrees of Freedom</b> | <b>Residual Deviance</b> | <b>F value</b> | <b>Pr(&gt;F)</b> |
|---------------------------|---------------------------|-----------------|------------------------------------|--------------------------|----------------|------------------|
| NULL                      |                           |                 | 131                                | 173.05                   |                |                  |
| gender                    | 2                         | 0.747           | 129                                | 172.30                   | 0.3575         | 0.70             |
| gait                      | 1                         | 17.280          | 128                                | 155.02                   | 16.5456        | <b>&lt;0.001</b> |
| sire                      | 35                        | 46.314          | 93                                 | 108.71                   | 1.2670         | 0.18             |





**Supplementary Item 16:** LTR ANOVA, all OC-affected horses (n = 133).

| <b>Predictor Variable</b> | <b>Degrees of Freedom</b> | <b>Deviance</b> | <b>Residual Degrees of Freedom</b> | <b>Residual Deviance</b> | <b>F value</b> | <b>Pr(&gt;F)</b> |
|---------------------------|---------------------------|-----------------|------------------------------------|--------------------------|----------------|------------------|
| NULL                      |                           |                 | 131                                | 156.62                   |                |                  |
| gender                    | 2                         | 3.528           | 129                                | 153.09                   | 1.7357         | 0.18             |
| gait                      | 1                         | 0.098           | 128                                | 152.99                   | 0.0961         | 0.76             |
| sire                      | 35                        | 49.914          | 93                                 | 103.08                   | 1.4034         | 0.10             |



**Supplementary Item 17:** Bilateral lesion ANOVA, all OC-affected horses (n = 133).

| <b>Predictor Variable</b> | <b>Degrees of Freedom</b> | <b>Deviance</b> | <b>Residual Degrees of Freedom</b> | <b>Residual Deviance</b> | <b>F value</b> | <b>Pr(&gt;F)</b> |
|---------------------------|---------------------------|-----------------|------------------------------------|--------------------------|----------------|------------------|
| NULL                      |                           |                 | 132                                | 181.65                   |                |                  |
| gender                    | 2                         | 3.151           | 130                                | 178.50                   | 1.3773         | 0.26             |
| gait                      | 1                         | 0.012           | 129                                | 178.49                   | 0.0102         | 0.92             |
| sire                      | 35                        | 42.542          | 94                                 | 135.95                   | 1.0624         | 0.40             |



**Supplementary Item 18:** Multiple regression results for *short-term performance: OC-affected horses at 2 years of age*. As all horses in this group were affected with OC, primary predictor variables of interest in this group were specific lesion location (DIRT, MM, LTR) and distribution (bilateral vs. unilateral). Reference states for these binomial predictor variables were unaffected (no) for lesion location and unilateral (bilat [no]) for lesion distribution. The reference group for effect estimates for all other categorical variables is denoted by REF. DIRT = distal intermediate ridge of the tibia; MM = medial malleolus of the tibia; LTR = lateral trochlear ridge of the talus; bilat = bilateral; time = fastest recorded time over a mile; G = gelding; M = mare; S = stallion; P = pace; T = trot; OR = odds ratio; IRR = incident rate ratio.

| Outcome Variable | Predictor Variable | Estimate (OR)  | 2.5% | 97.5% | p-value |
|------------------|--------------------|----------------|------|-------|---------|
| Started (yes/no) | DIRT (yes)         | 1.68           | 0.64 | 4.53  | 0.30    |
|                  | MM (yes)           | 1.60           | 0.61 | 4.45  | 0.35    |
|                  | LTR (yes)          | 0.68           | 0.27 | 1.67  | 0.40    |
|                  | bilat (yes)        | 0.50           | 0.22 | 1.12  | 0.10    |
|                  | gender (G)         | REF            | n/a  | n/a   | n/a     |
|                  | gender (M)         | 0.50           | 0.20 | 1.19  | 0.12    |
|                  | gender (S)         | 0.55           | 0.20 | 1.50  | 0.25    |
|                  | gait (P)           | REF            | n/a  | n/a   | n/a     |
|                  | gait (T)           | 0.45           | 0.20 | 1.02  | 0.06    |
| Outcome Variable | Predictor Variable | Estimate (IRR) | 2.5% | 97.5% | p-value |
| Starts (number)  | DIRT (yes)         | 0.92           | 0.51 | 1.67  | 0.78    |
|                  | MM (yes)           | 0.87           | 0.46 | 1.67  | 0.62    |

|                               |             |      |      |      |              |
|-------------------------------|-------------|------|------|------|--------------|
|                               | LTR (yes)   | 0.56 | 0.32 | 0.98 | <b>0.03</b>  |
|                               | bilat (yes) | 0.60 | 0.36 | 1.00 | <b>0.03</b>  |
|                               | gender (G)  | REF  | n/a  | n/a  | n/a          |
|                               | gender (M)  | 0.58 | 0.34 | 0.97 | <b>0.03</b>  |
|                               | gender (S)  | 0.47 | 0.26 | 0.86 | <b>0.01</b>  |
|                               | gait (P)    | REF  | n/a  | n/a  | n/a          |
|                               | gait (T)    | 0.45 | 0.28 | 0.73 | <b>0.001</b> |
|                               |             |      |      |      |              |
| Wins<br>(number)              | DIRT (yes)  | 0.81 | 0.38 | 1.69 | 0.58         |
|                               | MM (yes)    | 0.96 | 0.40 | 2.25 | 0.93         |
|                               | LTR (yes)   | 0.78 | 0.36 | 1.66 | 0.52         |
|                               | bilat (yes) | 1.49 | 0.82 | 2.74 | 0.19         |
|                               | gender (G)  | REF  | n/a  | n/a  | n/a          |
|                               | gender (M)  | 1.11 | 0.57 | 2.17 | 0.76         |
|                               | gender (S)  | 0.70 | 0.30 | 1.61 | 0.40         |
|                               | starts      | 1.10 | 1.03 | 1.19 | <b>0.01</b>  |
|                               | time        | 0.85 | 0.78 | 0.93 | <b>0.001</b> |
|                               | gait (P)    | REF  | n/a  | n/a  | n/a          |
|                               | gait (T)    | 0.72 | 0.96 | 3.11 | 0.08         |
|                               |             |      |      |      |              |
| Top 3<br>Finishes<br>(number) | DIRT (yes)  | 1.11 | 0.94 | 1.31 | 0.22         |
|                               | MM (yes)    | 1.07 | 0.89 | 0.28 | 0.48         |
|                               | LTR (yes)   | 1.06 | 0.90 | 1.23 | 0.51         |
|                               | bilat (yes) | 1.06 | 0.93 | 1.20 | 0.41         |
|                               | gender (G)  | REF  | n/a  | n/a  | n/a          |
|                               | gender (M)  | 1.08 | 0.94 | 1.25 | 0.27         |

|                                    |                           |                 |             |              |                  |
|------------------------------------|---------------------------|-----------------|-------------|--------------|------------------|
|                                    | gender (S)                | 0.91            | 0.77        | 1.08         | 0.29             |
|                                    | starts                    | 1.12            | 1.11        | 1.14         | <b>&lt;0.001</b> |
|                                    | time                      | 0.97            | 0.95        | 0.98         | <b>&lt;0.001</b> |
|                                    | gait (P)                  | REF             | n/a         | n/a          | n/a              |
|                                    | gait (T)                  | 1.13            | 0.99        | 1.28         | 0.08             |
|                                    |                           |                 |             |              |                  |
| <b>Outcome Variable</b>            | <b>Predictor Variable</b> | <b>Estimate</b> | <b>2.5%</b> | <b>97.5%</b> | <b>p-value</b>   |
| Earnings<br>(log[\$])              | DIRT (yes)                | 0.58            | -0.68       | 1.85         | 0.36             |
|                                    | MM (yes)                  | 0.09            | -1.30       | 1.48         | 0.89             |
|                                    | LTR (yes)                 | -0.10           | -1.29       | 1.09         | 0.86             |
|                                    | bilat (yes)               | 0.51            | -0.46       | 1.48         | 0.29             |
|                                    | gender (G)                | REF             | n/a         | n/a          | n/a              |
|                                    | gender (M)                | 0.62            | -0.47       | 1.70         | 0.26             |
|                                    | gender (S)                | -0.46           | -1.77       | 0.85         | 0.48             |
|                                    | starts                    | 0.27            | 0.16        | 0.39         | <b>&lt;0.001</b> |
|                                    | time                      | -0.33           | -0.46       | -0.21        | <b>&lt;0.001</b> |
|                                    | gait (P)                  | REF             | n/a         | n/a          | n/a              |
|                                    | gait (T)                  | 1.53            | 0.54        | 2.52         | <b>0.003</b>     |
|                                    |                           |                 |             |              |                  |
| Earnings Per<br>Start<br>(log[\$]) | DIRT (yes)                | 0.41            | -0.91       | 1.73         | 0.53             |
|                                    | MM (yes)                  | -0.28           | -1.71       | 1.15         | 0.70             |
|                                    | LTR (yes)                 | -0.64           | -1.83       | 0.55         | 0.28             |
|                                    | bilat (yes)               | 0.22            | -0.77       | 1.21         | 0.65             |
|                                    | gender (G)                | REF             | n/a         | n/a          | n/a              |
|                                    | gender (M)                | 0.18            | -0.90       | 1.26         | 0.74             |

|                                      |             |           |       |       |                  |
|--------------------------------------|-------------|-----------|-------|-------|------------------|
|                                      | gender (S)  | -0.95     | -2.24 | 0.34  | 0.14             |
|                                      | time        | 0.93      | -0.03 | 1.89  | <b>&lt;0.001</b> |
|                                      | gait (P)    | REF       | n/a   | n/a   | n/a              |
|                                      | gait (T)    | -0.31     | -0.44 | -0.18 | 0.06             |
|                                      |             |           |       |       |                  |
| Fastest Time<br>(s)                  | DIRT (yes)  | -0.34     | -3.57 | 2.89  | 0.83             |
|                                      | MM (yes)    | -3.00     | -6.38 | 0.37  | 0.08             |
|                                      | LTR (yes)   | -2.57     | -5.37 | 0.23  | 0.07             |
|                                      | bilat (yes) | 0.68      | -1.74 | 3.09  | 0.58             |
|                                      | gender (G)  | REF       | n/a   | n/a   | n/a              |
|                                      | gender (M)  | -2.51     | -5.04 | 0.03  | 0.05             |
|                                      | gender (S)  | -3.81     | -6.72 | -0.90 | <b>0.01</b>      |
|                                      | gait (P)    | REF       | n/a   | n/a   | n/a              |
|                                      | gait (T)    | 2.02      | -0.24 | 4.29  | 0.08             |
|                                      |             |           |       |       |                  |
| Yearling<br>Sales Price<br>(log[\$]) | DIRT (yes)  | 0.72      | 0.45  | 1.14  | 0.16             |
|                                      | MM (yes)    | 0.91      | 0.57  | 1.45  | 0.69             |
|                                      | LTR (yes)   | 1.13      | 0.70  | 1.83  | 0.60             |
|                                      | bilat (yes) | 1.21      | 0.84  | 1.74  | 0.31             |
|                                      | gender (G)  | REF       | n/a   | n/a   | n/a              |
|                                      | gender (M)  | 0.87      | 0.59  | 1.30  | 0.50             |
|                                      | gender (S)  | 1.12      | 0.67  | 1.88  | 0.65             |
|                                      | sale        | see ANOVA |       |       |                  |
|                                      | sire        |           |       |       |                  |





**Supplementary Item 19:** Yearling Sales Price ANOVA, all OC-affected horses (n = 133).

| Predictor Variable | Sum of Squares | Degrees of Freedom | F value | Pr(>F)       |
|--------------------|----------------|--------------------|---------|--------------|
| DIRT (yes)         | 1.385          | 1                  | 2.0421  | 0.16         |
| MM (yes)           | 0.111          | 1                  | 0.1644  | 0.69         |
| LTR (yes)          | 0.186          | 1                  | 0.2744  | 0.60         |
| bilat (yes)        | 0.709          | 1                  | 1.045   | 0.31         |
| gender             | 0.769          | 2                  | 0.5665  | 0.57         |
| sale               | 13.454         | 4                  | 4.9586  | <b>0.001</b> |
| sire               | 30.224         | 36                 | 1.2377  | 0.21         |

*Long-term performance: 2007 horses, 2- through 5-year-old seasons*

Performance outcome variables were examined by race season as well as cumulatively in this group (see Materials and Methods and Supplementary Item 2). The results of the multiple regression model for yearling sales price is reported with the cumulative performance models below. Yearlings in this cohort were sold at one of 4 breed-recognised sales between September and November 2008; one OC-affected horse was not sold and was not included in the analysis of sale price.





**Supplementary Item 20:** Multiple regression results for cumulative performance, 2- through 5-year-old seasons. OC = osteochondrosis; G = gelding; M = mare; S = stallion; P = pace; T = trot; OR = odds ratio; IRR = incident rate ratio; time = fastest recorded time over a mile. The reference group for effect estimates is denoted by REF.

| Outcome Variable | Predictor Variable | Estimate (OR)  | 2.5%  | 97.5% | p-value      |
|------------------|--------------------|----------------|-------|-------|--------------|
| Started (yes/no) | OC (no)            | REF            | n/a   | n/a   | n/a          |
|                  | OC (yes)           | 0.56           | 0.16  | 2.02  | 0.36         |
|                  | gender (G)         | REF            | n/a   | n/a   | n/a          |
|                  | gender (M)         | 0.09           | 0.006 | 0.53  | <b>0.03</b>  |
|                  | gender (S)         | 0.05           | 0.003 | 0.30  | <b>0.01</b>  |
|                  | gait (P)           | REF            | n/a   | n/a   | n/a          |
|                  | gait (T)           | 0.34           | 0.09  | 1.13  | 0.09         |
| Outcome Variable | Predictor Variable | Estimate (IRR) | 2.5%  | 97.5% | p-value      |
| Starts (number)  | OC (no)            | REF            | n/a   | n/a   | n/a          |
|                  | OC (yes)           | 0.96           | 0.67  | 1.40  | 0.82         |
|                  | gender (G)         | REF            | n/a   | n/a   | n/a          |
|                  | gender (M)         | 0.67           | 0.46  | 1.00  | 0.05         |
|                  | gender (S)         | 0.66           | 0.42  | 1.06  | 0.08         |
|                  | gait (P)           | REF            | n/a   | n/a   | n/a          |
|                  | gait (T)           | 0.56           | 0.40  | 0.80  | <b>0.001</b> |

| Wins<br>(number)              | OC (no)            | REF      | n/a  | n/a   | n/a              |
|-------------------------------|--------------------|----------|------|-------|------------------|
|                               | OC (yes)           | 0.76     | 0.60 | 0.97  | <b>0.03</b>      |
|                               | gender (G)         | REF      | n/a  | n/a   | n/a              |
|                               | gender (M)         | 1.00     | 0.77 | 1.29  | 0.98             |
|                               | gender (S)         | 1.18     | 0.87 | 1.60  | 0.28             |
|                               | starts             | 1.02     | 1.01 | 1.02  | <b>&lt;0.001</b> |
|                               | time               | 0.89     | 0.85 | 0.93  | <b>&lt;0.001</b> |
|                               | gait (P)           | REF      | n/a  | n/a   | n/a              |
|                               | gait (T)           | 1.58     | 1.22 | 2.04  | <b>0.001</b>     |
|                               |                    |          |      |       |                  |
| Top 3<br>Finishes<br>(number) | OC (no)            | REF      | n/a  | n/a   | n/a              |
|                               | OC (yes)           | 0.93     | 0.77 | 1.12  | 0.45             |
|                               | gender (G)         | REF      | n/a  | n/a   | n/a              |
|                               | gender (M)         | 0.95     | 0.77 | 1.17  | 0.59             |
|                               | gender (S)         | 1.11     | 0.87 | 1.41  | 0.41             |
|                               | starts             | 1.02     | 1.02 | 1.02  | <b>&lt;0.001</b> |
|                               | time               | 0.91     | 0.88 | 0.94  | <b>&lt;0.001</b> |
|                               | gait (P)           | REF      | n/a  | n/a   | n/a              |
|                               | gait (T)           | 1.35     | 1.11 | 1.65  | <b>0.01</b>      |
|                               |                    |          |      |       |                  |
| Outcome Variable              | Predictor Variable | Estimate | 2.5% | 97.5% | p-value          |
| Earnings<br>(log[\$])         | OC (no)            | REF      | n/a  | n/a   | n/a              |
|                               | OC (yes)           | 0.82     | 0.56 | 1.19  | 0.29             |
|                               | gender (G)         | REF      | n/a  | n/a   | n/a              |

|                                 |            |       |       |      |                  |
|---------------------------------|------------|-------|-------|------|------------------|
|                                 | gender (M) | 1.61  | 1.06  | 2.43 | <b>0.03</b>      |
|                                 | gender (S) | 1.10  | 0.67  | 1.79 | 0.71             |
|                                 | starts     | 1.01  | 1.00  | 1.02 | <b>0.002</b>     |
|                                 | time       | 0.73  | 0.69  | 0.78 | <b>&lt;0.001</b> |
|                                 | gait (P)   | REF   | n/a   | n/a  | n/a              |
|                                 | gait (T)   | 2.83  | 1.89  | 4.22 | <b>&lt;0.001</b> |
|                                 |            |       |       |      |                  |
| Earnings Per Start<br>(log[\$]) | OC (no)    | REF   | n/a   | n/a  | n/a              |
|                                 | OC (yes)   | 0.87  | 0.61  | 1.24 | 0.43             |
|                                 | gender (G) | REF   | n/a   | n/a  | n/a              |
|                                 | gender (M) | 1.76  | 1.19  | 2.59 | <b>0.01</b>      |
|                                 | gender (S) | 1.18  | 0.74  | 1.87 | 0.48             |
|                                 | time       | 0.78  | 0.74  | 0.82 | <b>&lt;0.001</b> |
|                                 | gait (P)   | REF   | n/a   | n/a  | n/a              |
|                                 | gait (T)   | 2.69  | 1.83  | 3.95 | <b>&lt;0.001</b> |
|                                 |            |       |       |      |                  |
| Fastest Time<br>(s)             | OC (no)    | REF   | n/a   | n/a  | n/a              |
|                                 | OC (yes)   | -0.71 | -2.37 | 0.96 | 0.40             |
|                                 | gender (G) | REF   | n/a   | n/a  | n/a              |
|                                 | gender (M) | -0.97 | -2.76 | 0.82 | 0.29             |
|                                 | gender (S) | -1.06 | -3.20 | 1.09 | 0.33             |
|                                 | gait (P)   | REF   | n/a   | n/a  | n/a              |
|                                 | gait (T)   | 3.55  | 1.97  | 5.13 | <b>&lt;0.001</b> |
|                                 |            |       |       |      |                  |
| Yearling Sales Price            | OC (no)    | REF   | n/a   | n/a  | n/a              |
|                                 | OC (yes)   | 0.91  | 0.67  | 1.23 | 0.55             |

|           |            |           |      |      |      |
|-----------|------------|-----------|------|------|------|
| (log[\$]) | gender (G) | REF       | n/a  | n/a  | n/a  |
|           | gender (M) | 0.89      | 0.64 | 1.25 | 0.51 |
|           | gender (S) | 0.84      | 0.57 | 1.23 | 0.36 |
|           | sale       | see ANOVA |      |      |      |
|           | sire       |           |      |      |      |



**Supplementary Item 21:** Yearling Sales Price ANOVA, horses born in 2007 (n = 94).

| <b>Predictor Variable</b> | <b>Sum of Squares</b> | <b>Degrees of Freedom</b> | <b>F value</b> | <b>Pr(&gt;F)</b> |
|---------------------------|-----------------------|---------------------------|----------------|------------------|
| OC                        | 0.1375                | 1                         | 0.3658         | 0.55             |
| gender                    | 0.3709                | 2                         | 0.4933         | 0.61             |
| sale                      | 20.7153               | 3                         | 18.3694        | <b>&lt;0.001</b> |
| sire                      | 29.5974               | 24                        | 3.2807         | <b>&lt;0.001</b> |



**Supplementary Item 22:** Multiple regression results for 2-year-old season. OC = osteochondrosis; G = gelding; M = mare; S = stallion; P = pace; T = trot; OR = odds ratio; IRR = incident rate ratio; time = fastest recorded time over a mile. The reference group for effect estimates is denoted by REF.

| Outcome Variable | Predictor Variable | Estimate (OR)  | 2.5% | 97.5% | p-value     |
|------------------|--------------------|----------------|------|-------|-------------|
| Started (yes/no) | OC (no)            | REF            | n/a  | n/a   | n/a         |
|                  | OC (yes)           | 1.13           | 0.44 | 2.99  | 0.81        |
|                  | gender (G)         | REF            | n/a  | n/a   | n/a         |
|                  | gender (M)         | 0.75           | 0.27 | 2.10  | 0.59        |
|                  | gender (S)         | 0.76           | 0.24 | 2.50  | 0.65        |
|                  | gait (P)           | REF            | n/a  | n/a   | n/a         |
|                  | gait (T)           | 0.41           | 0.16 | 0.98  | 0.05        |
| Outcome Variable | Predictor Variable | Estimate (IRR) | 2.5% | 97.5% | p-value     |
| Starts (number)  | OC (no)            | REF            | n/a  | n/a   | n/a         |
|                  | OC (yes)           | 1.16           | 0.69 | 1.97  | 0.55        |
|                  | gender (G)         | REF            | n/a  | n/a   | n/a         |
|                  | gender (M)         | 0.82           | 0.47 | 1.43  | 0.47        |
|                  | gender (S)         | 0.73           | 0.40 | 1.38  | 0.31        |
|                  | gait (P)           | REF            | n/a  | n/a   | n/a         |
|                  | gait (T)           | 0.55           | 0.34 | 0.89  | <b>0.01</b> |

|                               |                           |                 |             |              |                  |
|-------------------------------|---------------------------|-----------------|-------------|--------------|------------------|
| Wins<br>(number)              | OC (no)                   | REF             | n/a         | n/a          | n/a              |
|                               | OC (yes)                  | 0.91            | 0.45        | 1.76         | 0.78             |
|                               | gender (G)                | REF             | n/a         | n/a          | n/a              |
|                               | gender (M)                | 0.96            | 0.47        | 1.94         | 0.90             |
|                               | gender (S)                | 1.00            | 0.46        | 2.15         | 1.00             |
|                               | starts                    | 1.11            | 1.03        | 1.20         | <b>0.01</b>      |
|                               | time                      | 0.88            | 0.81        | 0.96         | <b>0.01</b>      |
|                               | gait (P)                  | REF             | n/a         | n/a          | n/a              |
|                               | gait (T)                  | 1.32            | 0.70        | 2.49         | 0.39             |
| Top 3<br>Finishes<br>(number) | OC (no)                   | REF             | n/a         | n/a          | n/a              |
|                               | OC (yes)                  | 0.92            | 0.63        | 1.33         | 0.67             |
|                               | gender (G)                | REF             | n/a         | n/a          | n/a              |
|                               | gender (M)                | 1.07            | 0.73        | 1.56         | 0.73             |
|                               | gender (S)                | 1.00            | 0.65        | 1.54         | 0.99             |
|                               | starts                    | 1.16            | 1.11        | 1.20         | <b>&lt;0.001</b> |
|                               | time                      | 0.96            | 0.91        | 1.00         | 0.08             |
|                               | gait (P)                  | REF             | n/a         | n/a          | n/a              |
|                               | gait (T)                  | 1.02            | 0.72        | 1.45         | 0.91             |
| <b>Outcome Variable</b>       | <b>Predictor Variable</b> | <b>Estimate</b> | <b>2.5%</b> | <b>97.5%</b> | <b>p-value</b>   |
| Earnings<br>(log[\$])         | OC (no)                   | REF             | n/a         | n/a          | n/a              |
|                               | OC (yes)                  | 1.40            | 0.63        | 3.10         | 0.39             |
|                               | gender (G)                | REF             | n/a         | n/a          | n/a              |
|                               | gender (M)                | 1.71            | 0.75        | 3.88         | 0.19             |

|                                 |            |       |       |      |                  |
|---------------------------------|------------|-------|-------|------|------------------|
|                                 | gender (S) | 1.15  | 0.45  | 2.91 | 0.76             |
|                                 | starts     | 1.18  | 1.09  | 1.27 | <b>&lt;0.001</b> |
|                                 | time       | 0.76  | 0.69  | 0.84 | <b>&lt;0.001</b> |
|                                 | gait (P)   | REF   | n/a   | n/a  | n/a              |
|                                 | gait (T)   | 2.24  | 1.09  | 4.60 | <b>0.03</b>      |
|                                 |            |       |       |      |                  |
| Earnings Per Start<br>(log[\$]) | OC (no)    | REF   | n/a   | n/a  | n/a              |
|                                 | OC (yes)   | 1.47  | 0.68  | 3.17 | 0.32             |
|                                 | gender (G) | REF   | n/a   | n/a  | n/a              |
|                                 | gender (M) | 1.72  | 0.78  | 3.78 | 0.17             |
|                                 | gender (S) | 1.09  | 0.44  | 2.71 | 0.85             |
|                                 | time       | 0.79  | 0.72  | 0.87 | <b>&lt;0.001</b> |
|                                 | gait (P)   | REF   | n/a   | n/a  | n/a              |
|                                 | gait (T)   | 1.93  | 0.95  | 3.91 | 0.07             |
|                                 |            |       |       |      |                  |
| Fastest Time<br>(s)             | OC (no)    | REF   | n/a   | n/a  | n/a              |
|                                 | OC (yes)   | 1.49  | -1.16 | 4.15 | 0.26             |
|                                 | gender (G) | REF   | n/a   | n/a  | n/a              |
|                                 | gender (M) | -0.42 | -3.17 | 2.34 | 0.76             |
|                                 | gender (S) | -0.66 | -3.85 | 2.53 | 0.68             |
|                                 | gait (P)   | REF   | n/a   | n/a  | n/a              |
|                                 | gait (T)   | 0.93  | -1.54 | 3.39 | 0.45             |





**Supplementary Item 23:** Multiple regression results for 3-year-old season. OC = osteochondrosis; G = gelding; M = mare; S = stallion; P = pace; T = trot; OR = odds ratio; IRR = incident rate ratio; time = fastest recorded time over a mile. The reference group for effect estimates is denoted by REF.

| Outcome Variable | Predictor Variable | Estimate (OR) | 2.5% | 97.5% | p-value     |
|------------------|--------------------|---------------|------|-------|-------------|
| Started (yes/no) | OC (no)            | REF           | n/a  | n/a   | n/a         |
|                  | OC (yes)           | 0.44          | 0.13 | 1.41  | 0.17        |
|                  | gender (G)         | REF           | n/a  | n/a   | n/a         |
|                  | gender (M)         | 0.31          | 0.07 | 1.21  | 0.11        |
|                  | gender (S)         | 0.17          | 0.04 | 0.69  | <b>0.02</b> |
|                  | gait (P)           | REF           | n/a  | n/a   | n/a         |
|                  | gait (T)           | 0.38          | 0.11 | 1.14  | 0.10        |

| Outcome Variable | Predictor Variable | Estimate (IRR) | 2.5% | 97.5% | p-value      |
|------------------|--------------------|----------------|------|-------|--------------|
| Starts (number)  | OC (no)            | REF            | n/a  | n/a   | n/a          |
|                  | OC (yes)           | 0.86           | 0.62 | 1.22  | 0.40         |
|                  | gender (G)         | REF            | n/a  | n/a   | n/a          |
|                  | gender (M)         | 0.83           | 0.58 | 1.20  | 0.33         |
|                  | gender (S)         | 0.65           | 0.43 | 1.00  | 0.05         |
|                  | gait (P)           | REF            | n/a  | n/a   | n/a          |
|                  | gait (T)           | 0.57           | 0.41 | 0.78  | <b>0.001</b> |

|                               |                           |                 |             |              |                  |
|-------------------------------|---------------------------|-----------------|-------------|--------------|------------------|
| Wins<br>(number)              | OC (no)                   | REF             | n/a         | n/a          | n/a              |
|                               | OC (yes)                  | 1.00            | 0.72        | 1.37         | 0.98             |
|                               | gender (G)                | REF             | n/a         | n/a          | n/a              |
|                               | gender (M)                | 0.79            | 0.55        | 1.15         | 0.22             |
|                               | gender (S)                | 1.05            | 0.68        | 1.30         | 0.83             |
|                               | starts                    | 1.05            | 1.02        | 1.07         | <b>0.001</b>     |
|                               | time                      | 0.90            | 0.85        | 0.95         | <b>&lt;0.001</b> |
|                               | gait (P)                  | REF             | n/a         | n/a          | n/a              |
|                               | gait (T)                  | 1.76            | 1.19        | 2.61         | <b>0.01</b>      |
| Top 3<br>Finishes<br>(number) | OC (no)                   | REF             | n/a         | n/a          | n/a              |
|                               | OC (yes)                  | 1.32            | 1.10        | 1.59         | <b>0.004</b>     |
|                               | gender (G)                | REF             | n/a         | n/a          | n/a              |
|                               | gender (M)                | 0.96            | 0.77        | 1.19         | 0.72             |
|                               | gender (S)                | 1.24            | 0.98        | 1.59         | 0.09             |
|                               | starts                    | 1.06            | 1.04        | 1.07         | <b>&lt;0.001</b> |
|                               | time                      | 0.94            | 0.91        | 0.97         | <b>&lt;0.001</b> |
|                               | gait (P)                  | REF             | n/a         | n/a          | n/a              |
|                               | gait (T)                  | 1.28            | 1.03        | 1.59         | <b>0.04</b>      |
| <b>Outcome Variable</b>       | <b>Predictor Variable</b> | <b>Estimate</b> | <b>2.5%</b> | <b>97.5%</b> | <b>p-value</b>   |
| Earnings<br>(log[\$])         | OC (no)                   | REF             | n/a         | n/a          | n/a              |
|                               | OC (yes)                  | 1.31            | 0.93        | 1.86         | 0.12             |
|                               | gender (G)                | REF             | n/a         | n/a          | n/a              |
|                               | gender (M)                | 1.60            | 1.06        | 2.40         | <b>0.03</b>      |

|                                 |            |       |       |       |                  |
|---------------------------------|------------|-------|-------|-------|------------------|
|                                 | gender (S) | 1.04  | 0.66  | 1.64  | 0.86             |
|                                 | starts     | 1.04  | 1.01  | 1.06  | <b>0.01</b>      |
|                                 | time       | 0.76  | 0.72  | 0.80  | <b>&lt;0.001</b> |
|                                 | gait (P)   | REF   | n/a   | n/a   | n/a              |
|                                 | gait (T)   | 2.63  | 1.74  | 3.96  | <b>&lt;0.001</b> |
|                                 |            |       |       |       |                  |
| Earnings Per Start<br>(log[\$]) | OC (no)    | REF   | n/a   | n/a   | n/a              |
|                                 | OC (yes)   | 1.26  | 0.91  | 1.74  | 0.17             |
|                                 | gender (G) | REF   | n/a   | n/a   | n/a              |
|                                 | gender (M) | 1.55  | 1.06  | 2.28  | <b>0.03</b>      |
|                                 | gender (S) | 1.01  | 0.72  | 1.67  | 0.65             |
|                                 | time       | 0.78  | 0.74  | 0.82  | <b>&lt;0.001</b> |
|                                 | gait (P)   | REF   | n/a   | n/a   | n/a              |
|                                 | gait (T)   | 2.96  | 2.04  | 4.29  | <b>&lt;0.001</b> |
|                                 |            |       |       |       |                  |
| Fastest Time<br>(s)             | OC (no)    | REF   | n/a   | n/a   | n/a              |
|                                 | OC (yes)   | -0.43 | -2.15 | 1.30  | 0.62             |
|                                 | gender (G) | REF   | n/a   | n/a   | n/a              |
|                                 | gender (M) | -2.66 | -4.55 | -0.77 | <b>0.01</b>      |
|                                 | gender (S) | -1.36 | -3.54 | 0.82  | 0.22             |
|                                 | gait (P)   | REF   | n/a   | n/a   | n/a              |
|                                 | gait (T)   | 3.97  | 2.33  | 5.62  | <b>&lt;0.001</b> |



**Supplementary Item 24:** Multiple regression results for 4-year-old season. OC = osteochondrosis; G = gelding; M = mare; S = stallion; P = pace; T = trot; OR = odds ratio; IRR = incident rate ratio; time = fastest recorded time over a mile. The reference group for effect estimates is denoted by REF.

| Outcome Variable | Predictor Variable | Estimate (OR)  | 2.5% | 97.5% | p-value      |
|------------------|--------------------|----------------|------|-------|--------------|
| Started (yes/no) | OC (no)            | REF            | n/a  | n/a   | n/a          |
|                  | OC (yes)           | 0.81           | 0.29 | 2.26  | 0.69         |
|                  | gender (G)         | REF            | n/a  | n/a   | n/a          |
|                  | gender (M)         | 0.19           | 0.06 | 0.58  | <b>0.01</b>  |
|                  | gender (S)         | 0.34           | 0.10 | 1.16  | 0.09         |
|                  | gait (P)           | REF            | n/a  | n/a   | n/a          |
|                  | gait (T)           | 0.20           | 0.07 | 0.50  | <b>0.001</b> |
| Outcome Variable | Predictor Variable | Estimate (IRR) | 2.5% | 97.5% | p-value      |
| Starts (number)  | OC (no)            | REF            | n/a  | n/a   | n/a          |
|                  | OC (yes)           | 1.05           | 0.66 | 1.69  | 0.85         |
|                  | gender (G)         | REF            | n/a  | n/a   | n/a          |
|                  | gender (M)         | 0.58           | 0.35 | 0.97  | <b>0.04</b>  |
|                  | gender (S)         | 0.73           | 0.41 | 1.33  | 0.29         |
|                  | gait (P)           | REF            | n/a  | n/a   | n/a          |
|                  | gait (T)           | 0.56           | 0.36 | 0.88  | <b>0.01</b>  |

|                               |                           |                 |             |              |                  |
|-------------------------------|---------------------------|-----------------|-------------|--------------|------------------|
| Wins<br>(number)              | OC (no)                   | REF             | n/a         | n/a          | n/a              |
|                               | OC (yes)                  | 0.77            | 0.53        | 1.12         | 0.18             |
|                               | gender (G)                | REF             | n/a         | n/a          | n/a              |
|                               | gender (M)                | 1.07            | 0.72        | 1.61         | 0.73             |
|                               | gender (S)                | 0.95            | 0.58        | 1.56         | 0.84             |
|                               | starts                    | 1.05            | 1.03        | 1.08         | <b>&lt;0.001</b> |
|                               | time                      | 0.93            | 0.87        | 0.93         | <b>0.02</b>      |
|                               | gait (P)                  | REF             | n/a         | n/a          | n/a              |
|                               | gait (T)                  | 1.49            | 1.00        | 2.23         | 0.05             |
| Top 3<br>Finishes<br>(number) | OC (no)                   | REF             | n/a         | n/a          | n/a              |
|                               | OC (yes)                  | 0.93            | 0.73        | 1.18         | 0.54             |
|                               | gender (G)                | REF             | n/a         | n/a          | n/a              |
|                               | gender (M)                | 0.91            | 0.69        | 1.21         | 0.51             |
|                               | gender (S)                | 1.01            | 0.73        | 1.40         | 0.97             |
|                               | starts                    | 1.07            | 1.05        | 1.09         | <b>&lt;0.001</b> |
|                               | time                      | 0.97            | 0.93        | 1.00         | 0.08             |
|                               | gait (P)                  | REF             | n/a         | n/a          | n/a              |
|                               | gait (T)                  | 1.13            | 0.87        | 1.47         | 0.38             |
| <b>Outcome Variable</b>       | <b>Predictor Variable</b> | <b>Estimate</b> | <b>2.5%</b> | <b>97.5%</b> | <b>p-value</b>   |
| Earnings<br>(log[\$])         | OC (no)                   | REF             | n/a         | n/a          | n/a              |
|                               | OC (yes)                  | 0.82            | 0.37        | 1.84         | 0.62             |
|                               | gender (G)                | REF             | n/a         | n/a          | n/a              |
|                               | gender (M)                | 1.18            | 0.47        | 2.98         | 0.72             |

|                                 |            |       |       |      |                  |
|---------------------------------|------------|-------|-------|------|------------------|
|                                 | gender (S) | 0.47  | 0.16  | 1.38 | 0.17             |
|                                 | starts     | 1.10  | 1.05  | 1.15 | <b>&lt;0.001</b> |
|                                 | time       | 0.78  | 0.69  | 0.88 | <b>&lt;0.001</b> |
|                                 | gait (P)   | REF   | n/a   | n/a  | n/a              |
|                                 | gait (T)   | 3.29  | 1.40  | 7.77 | <b>0.01</b>      |
|                                 |            |       |       |      |                  |
| Earnings Per Start<br>(log[\$]) | OC (no)    | REF   | n/a   | n/a  | n/a              |
|                                 | OC (yes)   | 0.76  | 0.35  | 1.66 | 0.49             |
|                                 | gender (G) | REF   | n/a   | n/a  | n/a              |
|                                 | gender (M) | 1.11  | 0.45  | 2.73 | 0.82             |
|                                 | gender (S) | 0.42  | 0.15  | 1.17 | 0.10             |
|                                 | time       | 0.76  | 0.68  | 0.85 | <b>&lt;0.001</b> |
|                                 | gait (P)   | REF   | n/a   | n/a  | n/a              |
|                                 | gait (T)   | 3.02  | 1.32  | 6.95 | <b>0.01</b>      |
|                                 |            |       |       |      |                  |
| Fastest Time<br>(s)             | OC (no)    | REF   | n/a   | n/a  | n/a              |
|                                 | OC (yes)   | -1.56 | -3.57 | 0.46 | 0.13             |
|                                 | gender (G) | REF   | n/a   | n/a  | n/a              |
|                                 | gender (M) | -1.40 | -3.74 | 0.94 | 0.24             |
|                                 | gender (S) | -1.99 | -4.63 | 0.66 | 0.14             |
|                                 | gait (P)   | REF   | n/a   | n/a  | n/a              |
|                                 | gait (T)   | 3.11  | 1.12  | 5.10 | <b>0.003</b>     |



**Supplementary Item 25:** Multiple regression results for 5-year-old season. OC = osteochondrosis; G = gelding; M = mare; S = stallion; P = pace; T = trot; OR = odds ratio; IRR = incident rate ratio; time = fastest recorded time over a mile. The reference group for effect estimates is denoted by REF.

| Outcome Variable | Predictor Variable | Estimate (OR)  | 2.5% | 97.5% | p-value     |
|------------------|--------------------|----------------|------|-------|-------------|
| Started (yes/no) | OC (no)            | REF            | n/a  | n/a   | n/a         |
|                  | OC (yes)           | 0.90           | 0.33 | 2.37  | 0.83        |
|                  | gender (G)         | REF            | n/a  | n/a   | n/a         |
|                  | gender (M)         | 0.21           | 0.07 | 0.60  | <b>0.01</b> |
|                  | gender (S)         | 0.43           | 0.13 | 1.38  | 0.16        |
|                  | gait (P)           | REF            | n/a  | n/a   | n/a         |
|                  | gait (T)           | 0.36           | 0.14 | 0.87  | <b>0.03</b> |
| Outcome Variable | Predictor Variable | Estimate (IRR) | 2.5% | 97.5% | p-value     |
| Starts (number)  | OC (no)            | REF            | n/a  | n/a   | n/a         |
|                  | OC (yes)           | 0.94           | 0.56 | 1.61  | 0.83        |
|                  | gender (G)         | REF            | n/a  | n/a   | n/a         |
|                  | gender (M)         | 0.58           | 0.33 | 1.02  | 0.07        |
|                  | gender (S)         | 0.57           | 0.30 | 1.17  | 0.10        |
|                  | gait (P)           | REF            | n/a  | n/a   | n/a         |
|                  | gait (T)           | 0.55           | 0.33 | 0.90  | <b>0.02</b> |

| Wins<br>(number)              | OC (no)            | REF      | n/a  | n/a   | n/a              |
|-------------------------------|--------------------|----------|------|-------|------------------|
|                               | OC (yes)           | 0.67     | 0.45 | 1.00  | 0.06             |
|                               | gender (G)         | REF      | n/a  | n/a   | n/a              |
|                               | gender (M)         | 1.01     | 0.63 | 1.61  | 0.97             |
|                               | gender (S)         | 1.34     | 0.81 | 2.24  | 0.27             |
|                               | starts             | 1.05     | 1.02 | 1.08  | <b>0.001</b>     |
|                               | time               | 0.90     | 0.82 | 0.98  | <b>0.03</b>      |
|                               | gait (P)           | REF      | n/a  | n/a   | n/a              |
|                               | gait (T)           | 1.14     | 0.90 | 2.22  | 0.14             |
|                               |                    |          |      |       |                  |
| Top 3<br>Finishes<br>(number) | OC (no)            | REF      | n/a  | n/a   | n/a              |
|                               | OC (yes)           | 0.92     | 0.70 | 1.21  | 0.54             |
|                               | gender (G)         | REF      | n/a  | n/a   | n/a              |
|                               | gender (M)         | 0.85     | 0.61 | 1.18  | 0.33             |
|                               | gender (S)         | 1.07     | 0.75 | 1.54  | 0.71             |
|                               | starts             | 1.04     | 1.02 | 1.06  | <b>&lt;0.001</b> |
|                               | time               | 0.94     | 0.88 | 1.00  | 0.06             |
|                               | gait (P)           | REF      | n/a  | n/a   | n/a              |
|                               | gait (T)           | 1.15     | 0.84 | 1.58  | 0.38             |
|                               |                    |          |      |       |                  |
| Outcome Variable              | Predictor Variable | Estimate | 2.5% | 97.5% | p-value          |
| Earnings<br>(log[\$])         | OC (no)            | REF      | n/a  | n/a   | n/a              |
|                               | OC (yes)           | 0.77     | 0.50 | 1.18  | 0.23             |
|                               | gender (G)         | REF      | n/a  | n/a   | n/a              |



|                                 |            |       |       |      |                  |
|---------------------------------|------------|-------|-------|------|------------------|
|                                 | gender (M) | 0.77  | 0.46  | 1.27 | 0.29             |
|                                 | gender (S) | 0.94  | 0.54  | 1.65 | 0.82             |
|                                 | starts     | 1.05  | 1.02  | 1.08 | <b>0.003</b>     |
|                                 | time       | 0.74  | 0.67  | 0.81 | <b>&lt;0.001</b> |
|                                 | gait (P)   | REF   | n/a   | n/a  | n/a              |
|                                 | gait (T)   | 2.66  | 1.65  | 4.29 | <b>&lt;0.001</b> |
|                                 |            |       |       |      |                  |
| Earnings Per Start<br>(log[\$]) | OC (no)    | REF   | n/a   | n/a  | n/a              |
|                                 | OC (yes)   | 0.78  | 0.52  | 1.18 | 0.23             |
|                                 | gender (G) | REF   | n/a   | n/a  | n/a              |
|                                 | gender (M) | 0.81  | 0.50  | 1.30 | 0.36             |
|                                 | gender (S) | 0.93  | 0.57  | 1.51 | 0.76             |
|                                 | time       | 0.74  | 0.68  | 0.80 | <b>&lt;0.001</b> |
|                                 | gait (P)   | REF   | n/a   | n/a  | n/a              |
|                                 | gait (T)   | 2.59  | 1.63  | 4.10 | <b>&lt;0.001</b> |
|                                 |            |       |       |      |                  |
| Fastest Time<br>(s)             | OC (no)    | REF   | n/a   | n/a  | n/a              |
|                                 | OC (yes)   | -0.35 | -2.15 | 1.45 | 0.69             |
|                                 | gender (G) | REF   | n/a   | n/a  | n/a              |
|                                 | gender (M) | 0.48  | -1.63 | 2.58 | 0.65             |
|                                 | gender (S) | -0.17 | -2.33 | 1.99 | 0.87             |
|                                 | gait (P)   | REF   | n/a   | n/a  | n/a              |
|                                 | gait (T)   | 2.93  | 1.18  | 4.69 | <b>0.002</b>     |



**Supplementary Item 26:** Multiple regression results for only radiographed individuals in the 2007 study cohort (n = 32 OC-affected; n= 28 OC-unaffected) for which OC was a significant predictor variable. OC = osteochondrosis; G = gelding; M = mare; S = stallion; P = pace; T = trot; OR = odds ratio; IRR = incident rate ratio; time = fastest recorded time over a mile. The reference group for effect estimates is denoted by REF. The comparable results in the full long-term performance cohort can be found in the tables indicated in the last column.

| Outcome Variable                   | Predictor Variable | Estimate (IRR) | 2.5% | 97.5% | p-value          | Results comparison |
|------------------------------------|--------------------|----------------|------|-------|------------------|--------------------|
| Wins at 5 years (number)           | OC (no)            | REF            | n/a  | n/a   | n/a              | Suppl. Item 25     |
|                                    | OC (yes)           | 0.59           | 0.37 | 0.93  | <b>0.04</b>      |                    |
|                                    | gender (G)         | REF            | n/a  | n/a   | n/a              |                    |
|                                    | gender (M)         | 0.73           | 0.39 | 1.38  | 0.35             |                    |
|                                    | gender (S)         | 1.36           | 0.74 | 2.50  | 0.32             |                    |
|                                    | starts             | 1.06           | 1.03 | 1.10  | <b>0.004</b>     |                    |
|                                    | time               | 0.88           | 0.78 | 1.00  | 0.07             |                    |
|                                    | gait (P)           | REF            | n/a  | n/a   | n/a              |                    |
|                                    | gait (T)           | 1.33           | 0.69 | 2.52  | 0.38             |                    |
| Top 3 Finishes at 3 years (number) | OC (no)            | REF            | n/a  | n/a   | n/a              | Suppl. Item 23     |
|                                    | OC (yes)           | 1.36           | 1.11 | 1.68  | <b>0.01</b>      |                    |
|                                    | gender (G)         | REF            | n/a  | n/a   | n/a              |                    |
|                                    | gender (M)         | 1.15           | 0.87 | 1.53  | 0.33             |                    |
|                                    | gender (S)         | 1.34           | 1.03 | 1.75  | <b>0.04</b>      |                    |
|                                    | starts             | 1.06           | 1.04 | 1.08  | <b>&lt;0.001</b> |                    |
|                                    | time               | 0.96           | 0.92 | 0.99  | <b>0.03</b>      |                    |

|                                   | gait (P)                  | REF             | n/a         | n/a          | n/a            |                           |
|-----------------------------------|---------------------------|-----------------|-------------|--------------|----------------|---------------------------|
|                                   | gait (T)                  | 1.04            | 0.79        | 1.36         | 0.79           |                           |
|                                   |                           |                 |             |              |                |                           |
| <b>Outcome Variable</b>           | <b>Predictor Variable</b> | <b>Estimate</b> | <b>2.5%</b> | <b>97.5%</b> | <b>p-value</b> | <b>Results comparison</b> |
| Fastest Time<br>at 4 years<br>(s) | OC (no)                   | REF             | n/a         | n/a          | n/a            | Suppl. Item 24            |
|                                   | OC (yes)                  | -2.73           | -5.06       | -0.40        | <b>0.02</b>    |                           |
|                                   | gender (G)                | REF             | n/a         | n/a          | n/a            |                           |
|                                   | gender (M)                | -2.88           | -5.45       | -0.31        | <b>0.03</b>    |                           |
|                                   | gender (S)                | -4.60           | -7.78       | -1.42        | <b>0.01</b>    |                           |
|                                   | gait (P)                  | REF             | n/a         | n/a          | n/a            |                           |
|                                   | gait (T)                  | 4.32            | 2.06        | 6.58         | <b>0.001</b>   |                           |
